# Supplementary material
Source: PubMed Central journal article supplement (PMC4249003)
Supplement: AEM.01803-14_zam999105736so1.pdf [file AEM.01803-14_zam999105736so1.pdf]

**Supplementary material to the article**

**Silver resistance genes are overrepresented among *Escherichia coli* isolates with  
CTX-M-production**

Susanne Sütterlin<sup>1#</sup>, Petra Edquist<sup>1</sup>, Linus Sandegren<sup>2</sup>, Marlen Adler<sup>2</sup>, Thomas Tängdén<sup>3</sup>,  
Mirva Drobni<sup>3</sup>, Björn Olsen<sup>3</sup>, Åsa Melhus<sup>1</sup>

Department of Medical Sciences/<sup>1</sup>Sections of Clinical Bacteriology and <sup>3</sup>Infectious Diseases,  
<sup>2</sup>Department of Medical Biochemistry and Microbiology, Uppsala University, Uppsala,  
Sweden

**Antibiotic susceptibility of human and avian isolates in relation to phenotypic characteristics of carried beta-lactamases.**

| <b>Human isolates</b>            | <b>Antibiotics</b>      | <b>S (%)</b> | <b>I (%)</b> | <b>R (%)</b> |
|----------------------------------|-------------------------|--------------|--------------|--------------|
| ESBL-positive ( <i>n</i> =53)    | Cefotaxime              | 0            | 0            | 100          |
|                                  | Piperacillin/tazobactam | 60           | 30           | 10           |
|                                  | Meropenem               | 100          | 0            | 0            |
|                                  | Ciprofloxacin           | 53           | 0            | 47           |
|                                  | Co-trimoxazole          | 25           | 2            | 73           |
|                                  | Gentamicin              | 58           | 21           | 21           |
| ESBL-negative ( <i>n</i> =52)    | Cefotaxime              | 100          | 0            | 0            |
|                                  | Piperacillin/tazobactam | 96           | 2            | 2            |
|                                  | Meropenem               | 100          | 0            | 0            |
|                                  | Ciprofloxacin           | 100          | 0            | 0            |
|                                  | Co-trimoxazole          | 83           | 0            | 17           |
|                                  | Gentamicin              | 98           | 2            | 0            |
| <b>Avian isolates</b>            |                         |              |              |              |
| ESBL-positive<br>( <i>n</i> =19) | Cefotaxime              | 0            | 0            | 100          |
|                                  | Piperacillin/tazobactam | 100          | 0            | 0            |
|                                  | Meropenem               | 100          | 0            | 0            |
|                                  | Ciprofloxacin           | 68           | 0            | 32           |
|                                  | Co-trimoxazole          | 63           | 0            | 37           |
|                                  | Gentamicin              | 95           | 5            | 0            |
| ESBL-negative ( <i>n</i> =92)    | Cefotaxime              | 100          | 0            | 0            |
|                                  | Piperacillin/tazobactam | 100          | 0            | 0            |
|                                  | Meropenem               | 100          | 0            | 0            |
|                                  | Ciprofloxacin           | 100          | 0            | 0            |
|                                  | Co-trimoxazole          | 96           | 0            | 4            |
|                                  | Gentamicin              | 100          | 0            | 0            |

## Primers used in this study

| Target      | Primer pair                                                                                               | Product size (bp) | Annealing temp (°C) | Reference                 |
|-------------|-----------------------------------------------------------------------------------------------------------|-------------------|---------------------|---------------------------|
| sil         | SilE-F 5'-GTACTCCCCCGGACATCACTAATT-3'<br>SilE-R 5'-GGCCAGACTGACCGTTATT-3'                                 | 400               | 55                  | 2008, Percival,<br>OW Man |
|             | SilS-F 5'-GGAGATCCCCGGATGCATAGCAA-3'<br>SilS-R 5'-GTTTGCTGCATGACAG-<br>GCTAAAGACATC-3'                    | 1500              | 57                  |                           |
|             | SilP-F 5'-<br>CATGACATATCCTGAAGACAGAAAATGC-3'<br>SilP-R 5'-CGGGCAGACCAGCAATAACAGATA-<br>3'                | 2500              | 57                  |                           |
| merA        | merA1-F 5'-ACC ATC GGC GGC ACC TGC GT-<br>'3<br>merA5-R 5'-CC ATC GTC AGG TAG GGG AAC<br>AA-3'            | 1253              | 64                  | 2006, Novais,<br>AAC      |
|             |                                                                                                           |                   |                     |                           |
| CTX-M<br>I  | CTX-3F5'-AAT CAC TGC GCC AGT TCA CGC<br>T-3'<br>CTX-3R 5'-GAA CGT TTC GTC TCC CAG CTG<br>T-3'             | 479               | 62                  | 2008, Lytsy,<br>APMIS     |
|             |                                                                                                           |                   |                     |                           |
| CTX-M<br>IV | CTX-14F 5'-TAC CGC AGA TAA TAC GCA GGT<br>G-3'<br>CTX-14R 5'-CAG CGT AGG TTC AGT GCG ATC<br>C-3'          | 474               | 62                  | 2008, Lytsy,<br>APMIS     |
|             |                                                                                                           |                   |                     |                           |
| TEM         | TEM-F 5'-ATG AGT ATT CAA CAT TTC CGT-3'<br>TEM-R 5'-TTA CCA ATG CTT AAT CAG TGA-<br>3'                    | 861               | 50                  | 2008, Lytsy,<br>APMIS     |
| SHV         | SHV-F2 5'-AAC GGA ACT GAA TGA GGC GCT-<br>3'                                                              | 141               | 62                  | 2008, Lytsy,<br>APMIS     |
|             | SHV-R2 5'-TCC ACC ATC CAC TGC AGC AGC<br>T-3'                                                             | 860               | 55                  |                           |
|             | SHV-F3 5'-ATG CGT TAT ATT CGC CTG TG-3'<br>SHV-R1 5'-TAG CGT TGC CAG TGC TCG-3'                           |                   |                     |                           |
|             |                                                                                                           |                   |                     |                           |
| papB        | O25pabBspe.F 5' -TCC AGC AGG TGC TGG ATC<br>GT-3'<br>O25pabBspe.R 5' -GCG AAA TTT TTC GCC GTA<br>CTG T-3' | 347               | 65                  | 2009,<br>Clermont, JAC    |
|             |                                                                                                           |                   |                     |                           |

**Results of MLST and eBURST analysis for the randomly chosen isolats (total n=31)**

| Clonal            | Isolates                        |                                    |                 | MLST                                             |
|-------------------|---------------------------------|------------------------------------|-----------------|--------------------------------------------------|
| Complex           | <i>silE</i> -positive<br>(n=13) | <i>silE</i> -<br>negative<br>(n=8) | avian<br>(n=10) |                                                  |
| ST10 complex      |                                 | n=5                                |                 | ST44, ST46, ST167, ST540,<br>ST1314              |
|                   | n=4                             |                                    |                 | ST10 (n=2, one ESBL-negative),<br>ST1312, ST1598 |
| ST58 complex      | n=6                             |                                    |                 | ST58, ST155, ST205, ST424,<br>ST940 (n=2)        |
| ST88 complex      |                                 | n=1                                |                 | ST625                                            |
|                   |                                 |                                    | n=1             | ST90                                             |
| ST131<br>complex  |                                 |                                    | n=1             | ST131                                            |
| ST38 complex      |                                 | n=1                                |                 | ST38                                             |
| ST648<br>complex  |                                 | n=1                                | n=1             | ST648 (n=2)                                      |
| ST127<br>complex  | n=1                             |                                    |                 | ST127                                            |
| ST457<br>complex  |                                 |                                    | n=1             | ST457                                            |
| ST681<br>complex  |                                 |                                    | n=1             | ST681                                            |
| ST1140<br>complex |                                 |                                    | n=2             | ST1140 (n=2)                                     |
| ST665<br>complex  |                                 |                                    | n=1             | ST665                                            |
|                   | n=1                             |                                    |                 | ST409 (ESBL-negative)                            |
|                   | n=1                             |                                    |                 | ST388                                            |
|                   |                                 |                                    | n=1             | ST1199                                           |
|                   |                                 |                                    | n=1             | ST1143                                           |
